# Supplementary material
Source: publisher site journal article supplement (https://www.dovepress.com/article/570398)
Supplement: Supplementary file 1 [file 570398%20Supplementary%20material.docx]

**Supplementary Table 1. Correlation between subjective and objective sleep parameters in the paradoxical and non-paradoxical insomnia group**

| Groups | Variables | | Correlation | P value |
| --- | --- | --- | --- | --- |
| Non-paradoxical insomnia | Subjective SOL | Objective SOL | 0.152 | < 0.001 |
| Non-paradoxical insomnia | Subjective TST | Objective TST | 0.139 | < 0.001 |
| Paradoxical insomnia | Subjective SOL | Objective SOL | 0.107 | 0.083 |
| Paradoxical insomnia | Subjective TST | Objective TST | 0.145 | 0.019 |

SOL = Sleep onset latency, TST = Total sleep time.

Subjective SOL and TST refers to the data obtained from sleep diaries.

Objective SOL and TST refers to the data obtained from polysomnography.

**Supplementary Table 2. Gender differences between paradoxical and non-paradoxical insomnia groups**

| **Variables** | **Non-paradoxical insomnia** | | | | **Paradoxical insomnia** | | | |
| --- | --- | --- | --- | --- | --- | --- | --- | --- |
| **Male**  **(n=187)** | **Female**  **(n=412)** | **t/** | **p** | **Male**  **(n=102)** | **Female**  **(n=161)** | **t/** | **p** |
| **Age, years** | 35.16 (10.59) | 39.88 (12.41) | -4.781 | **< 0.001** | 35.36 (11.22) | 43.10 (11.76) | -5.346 | **< 0.001** |
| **Ethnicity, n (%)** |  |  | 0.380 | 0.538 |  |  | / | 0.715 |
| Han | 179 (95.7) | 400 ( 97.1) |  |  | 98 ( 96.1) | 157 ( 97.5) |  |  |
| Others | 8 (4.3) | 12 (2.9) |  |  | 4 (3.9) | 4 (2.5) |  |  |
| **BMI, kg/m²** | 22.70 (2.52) | 22.10 (2.78) | 2.324 | **0.021** | 22.85 (3.08) | 21.76 (2.72) | 2.071 | **0.042** |
| **HAMD** | 6.17 (2.38) | 6.18 (2.36) | -0.078 | 0.938 | 6.69 (2.82) | 6.52 (2.80) | 0.470 | 0.639 |
| Depression symptoms | 0.49 (0.90) | 0.55 (0.89) | -0.777 | 0.438 | 0.75 (1.15) | 0.59 (1.03) | 1.153 | 0.250 |
| Anxiety symptoms | 0.98 (1.14) | 0.93 (1.15) | 0.463 | 0.644 | 1.08 (1.11) | 1.14 (1.30) | -0.392 | 0.696 |
| Insomnia symptoms | 4.36 (1.33) | 4.34 (1.22) | 0.120 | 0.905 | 4.31 (1.30) | 4.25 (1.24) | 0.394 | 0.694 |
| Somatic symptoms | 0.34 (0.69) | 0.35 (0.64) | -0.251 | 0.802 | 0.54 (0.83) | 0.54 (0.82) | 0.016 | 0.987 |
| **HAMA** | 5.48 (2.56) | 5.40 (2.47) | 0.327 | 0.744 | 5.71 (2.84) | 5.61 (2.79) | 0.255 | 0.799 |
| Psychic anxiety | 4.87 (1.96) | 4.74 (1.86) | 0.786 | 0.432 | 4.77 (2.01) | 4.73 (2.06) | 0.186 | 0.853 |
| Somatic anxiety | 0.60 (1.15) | 0.67 (1.19) | -0.594 | 0.553 | 0.93 (1.39) | 0.89 (1.36) | 0.248 | 0.804 |
| **ISI** | 18.50 (3.16) | 18.33 (3.16) | 0.619 | 0.536 | 17.08 (3.88) | 18.32 (3.08) | -2.739 | **0.007** |
| **Biochemical parameters** | | | | | | | | |
| LDL-C, mmol/L | 2.83 (0.71) | 2.85 (0.74) | -0.347 | 0.729 | 2.70 (0.71) | 2.89 (0.83) | -1.808 | 0.072 |
| TG, mmol/L | 1.29 (0.87) | 1.14 (0.65) | 1.796 | 0.074 | 1.28 (0.57) | 1.17 (0.78) | 1.250 | 0.213 |
| HDL-C, mmol/L | 1.27 (0.25) | 1.49 (0.31) | -8.312 | **< 0.001** | 1.20 (0.22) | 1.53 (0.35) | -8.799 | **< 0.001** |
| TC, mmol/L | 4.65 (0.88) | 4.86 (0.90) | -2.386 | **0.018** | 4.45 (0.82) | 4.95 (1.01) | -4.121 | **< 0.001** |
| **Sleep diaries** | | | | | | | | |
| SOL, min | 70.29 (36.11) | 75.31 (40.34) | -1.519 | 0.130 | 65.97 (42.20) | 60.15 (37.67) | 1.134 | 0.258 |
| Sleep onset difficulty | 3.47 (0.55) | 3.50 (0.60) | -0.682 | 0.496 | 3.34 (0.81) | 3.30 (0.76) | 0.384 | 0.701 |
| Sleep quality | 3.33 (0.66) | 3.42 (0.64) | -1.525 | 0.128 | 3.42 (0.79) | 3.32 (0.73) | 1.071 | 0.285 |
| TIB, min | 500.79 (34.48) | 508.25 (39.39) | -2.338 | **0.020** | 498.48 (53.99) | 501.92 (39.58) | -0.554 | 0.581 |
| TST, min | 424.19 (53.09) | 423.64 (57.79) | 0.112 | 0.911 | 402.13 (79.40) | 420.03 (67.50) | -1.879 | 0.062 |
| SE, % | 84.65 (8.62) | 83.36 (9.36) | 1.661 | 0.098 | 80.77 (13.67) | 83.75 (11.98) | -1.797 | 0.074 |
| **PSG parameters** | | | | | | | | |
| TST, min | 300.39 (68.58) | 299.15 (65.06) | 0.209 | 0.835 | 356.80 (53.22) | 365.31 (40.65) | -1.380 | 0.169 |
| LPS, min | 83.66 (45.88) | 87.95 (49.31) | -1.037 | 0.300 | 21.89 (13.46) | 23.11 (14.48) | -0.700 | 0.485 |
| REMSL, min | 110.19 (54.45) | 114.85 (54.29) | -0.953 | 0.341 | 102.28 (58.34) | 100.54 (40.10) | 0.264 | 0.792 |
| WASO, min | 110.40 (55.06) | 108.20 (55.04) | 0.453 | 0.651 | 102.23 (53.90) | 94.68 (43.08) | 1.194 | 0.234 |
| SE, mean (SD) | 62.64 (14.23) | 62.57 (13.59) | 0.058 | 0.954 | 74.55 (10.88) | 76.14 (8.39) | -1.254 | 0.211 |
| AHI, events per hour | 3.19 (2.43) | 2.38 (2.37) | 3.815 | **< 0.001** | 3.52 (2.38) | 3.02 (2.61) | 1.603 | 0.110 |
| PLMI, events per hour | 1.24 (1.93) | 1.03 (1.73) | 1.258 | 0.210 | 1.70 (2.52) | 1.25 (2.11) | 1.504 | 0.134 |
| Wake stage, min | 115.78 (65.38) | 122.69 (70.49) | -1.169 | 0.243 | 93.53 (51.82) | 91.46 (45.97) | 0.329 | 0.743 |
| REM stage, min | 61.07 (22.95) | 60.34 (23.27) | 0.358 | 0.720 | 72.78 (23.06) | 76.97 (22.69) | -1.443 | 0.151 |
| N1 stage, min | 46.91 (20.50) | 42.34 (19.94) | 2.550 | **0.011** | 50.18 (21.96) | 45.41 (22.39) | 1.705 | 0.090 |
| N2 stage, min | 127.51 (41.75) | 127.44 (39.16) | 0.021 | 0.984 | 154.80 (40.79) | 158.09 (37.38) | -0.657 | 0.512 |
| N3 stage, min | 64.90 (25.12) | 69.28 (27.88) | -1.912 | 0.057 | 79.24 (23.38) | 85.15 (28.80) | -1.823 | 0.070 |
| REM stage, % | 19.66(5.84) | 19.77(6.13) | -0.209 | 0.834 | 20.19 (5.39) | 20.85 (5.20) | -0.975 | 0.331 |
| N1 stage, % | 16.79 (10.83) | 14.69(7.49) | 2.400 | **0.017** | 14.39 (6.71) | 12.63 (6.62) | 2.084 | 0.038 |
| N2 stage, % | 41.84(9.23) | 42.38(8.35) | -0.690 | 0.491 | 43.01 (7.93) | 43.09 (8.06) | -0.078 | 0.938 |
| N3 stage, % | 21.72 (8.31) | 23.26 (8.44) | -2.095 | **0.037** | 22.47 (6.63) | 23.51 (8.24) | -1.124 | 0.262 |
| ArI, events per hour | 4.31 (2.81) | 3.99 (1.70) | 1.453 | 0.148 | 3.98 (1.62) | 3.61 (1.62) | 1.801 | 0.073 |

Values are shown as mean (standard deviation) or number (percentage). Bold values are statistically significant.

SD = Standard deviation, BMI = Body mass index, HAMD = Hamilton Depression Rating Scale, HAMA = Hamilton Rating Scale for Anxiety, ISI = Insomnia Severity Index, TG = Triglycerides, TC = Total cholesterol, HDL-C = High-density lipoprotein cholesterol, LDL-C = Low-density lipoprotein, PSG = Polysomnography, SOL = Sleep onset latency, TIB = Time in bed, TST = Total sleep time, SE = Sleep efficiency, REMSL = Rapid eye movement sleep latency, WASO = Wake after sleep onset, AHI = Apnea-hypopnea index, PLMI = Periodic leg movement index, REM = Rapid eye movement, ArI = Arousal index.
